# Supplementary material for: Predictors of treatment response in a lupus nephritis population: lessons from the Aspreva Lupus Management Study (ALMS) trial
Source: HighWire-hosted journal article supplement (doi:10.1136/lupus-2021-000584), 2022-05-01
Supplement: lupus-2021-000584supp003_data_supplement.pdf [file lupus-2021-000584supp003_data_supplement.pdf]

Supplementary Figure S3: Improvement at 6 months

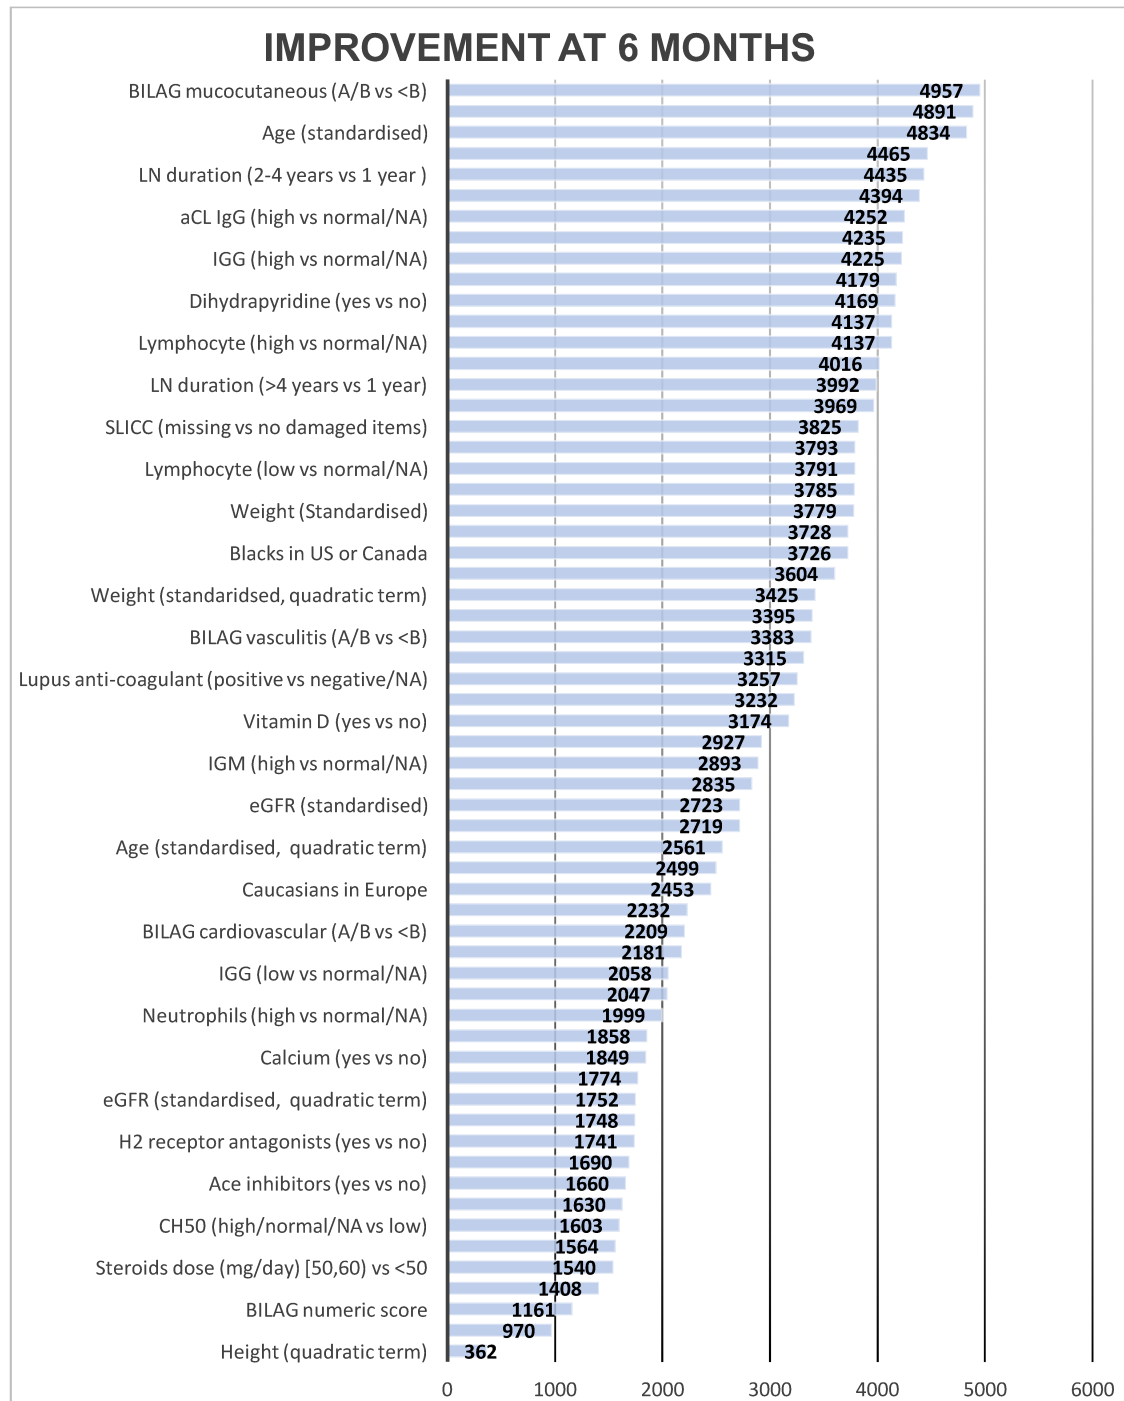

Blue bars represent frequencies that each predictor was chosen by LASSO
